# Supplementary material for: Plankton-derived environmental DNA extracted from abyssal sediments preserves patterns of plankton macroecology
Source: Copernicus journal article supplement (doi:10.5194/bg-2016-486), 2016-11-22
Supplement: Supplementary file 1 [file Supplement 1.xlsx]

## Sheet: Supplement 1
Library name	Cruise	Station	Date	Depth	Latitude	Longitude	Sediment type	Reference	Total raw reads	Filtered reads	Dereplicated sequences	Reads – no singletons	Dereplicated sequences – no singletons	Total number of planktonic foraminifera reads	Number of planktonic foraminifera dereplicated sequences	Number of retained reads	Number of unique e-ribotype per sample	Number of unique genotype per sample	Number of unique morphospecies per sample
SFA07	ANTXXIV-2	033-12	2007-12-30	5338 m	-62.0039	-3.0004	deep-sea mud	http://epic.awi.de/29172/1/Bat2010a.pdf	2544701	1068824	14874	1061155	7205	12872	87	12605	14	1	1
SFA08	ANTXXIV-2	085-5	2008-01-26	2981 m	-52.0112	0.0012	foraminifera/diatom ooze with greenish fluff layer	http://epic.awi.de/29172/1/Bat2010a.pdf	2313452	1167629	20726	1155508	8605	906	11	900	9	3	3
SFA09	ANTXXIV-2	085-7	2008-01-27	2996 m	-52.0135	0.0004	foraminifera/diatom ooze with greenish fluff layer	http://epic.awi.de/29172/1/Bat2010a.pdf	3032853	1318054	21069	1305780	8795	2636	27	2632	25	5	4
SFA22	ANTXXIV-2	085-5	2008-01-26	2981 m	-52.0112	0.0012	foraminifera/diatom ooze with greenish fluff layer	http://epic.awi.de/29172/1/Bat2010a.pdf	1005150	426829	16885	416791	6847	824	20	786	10	4	4
SFA23	ANTXXIV-2	085-5	2008-01-26	2981 m	-52.0112	0.0012	foraminifera/diatom ooze with greenish fluff layer	http://epic.awi.de/29172/1/Bat2010a.pdf	2610822	1325867	17689	1316640	8462	967	11	958	7	2	2
SFA24	ANTXXIV-2	085-5	2008-01-26	2981 m	-52.0112	0.0012	foraminifera/diatom ooze with greenish fluff layer	http://epic.awi.de/29172/1/Bat2010a.pdf	2016400	1022846	14983	1014604	6741	872	4	872	4	1	1
SFA02	ARK22-2	265-1	2007-08-13	3538 m	83.4258	60.3827	no information	http://epic.awi.de/28697/1/Sch2008ae.pdf	4875252	3169462	10781	3163420	4739	0	0	0	0	0	0
SFA03	ARK22-2	265-2	2007-08-13	3519 m	83.4154	60.4055	no information	http://epic.awi.de/28697/1/Sch2008ae.pdf	4237150	3418181	39647	3392323	13789	5314	50	5268	36	5	1
SFA04	ARK22-2	239-6	2007-08-01	221 m	80.594	34.0013	no information	http://epic.awi.de/28697/1/Sch2008ae.pdf	2032210	1988415	29299	1968578	9462	0	0	0	0	0	0
SFA05	ARK22-2	309-8	2007-08-28	4443 m	87.0414	104.396	no information	http://epic.awi.de/28697/1/Sch2008ae.pdf	3936158	3286780	34998	3263576	11794	0	0	0	0	0	0
SFA19	ARK22-2	299-2	2007-08-23	3696 m	84.0222	89.0607	no information	To be completed	1628404	858703	10652	853354	5303	3989	46	3989	46	6	4
SFA20	ARK22-2	299-2	2007-08-23	3696 m	84.022	89.0607	no information	To be completed	1894591	1029908	9623	1025545	5260	11599	77	11566	66	5	3
SFA21	ARK22-2	299-2	2007-08-23	3696 m	84.022	89.0607	no information	To be completed	1807474	1004018	11913	997799	5694	6356	70	6273	38	3	2
SFA16	Galathea 3	Win 3	2007-03-22	4352 m	17.582	-65.01	no information	To be completed	2691997	528565	8885	522970	3290	68	6	68	6	4	4
SFA17	Galathea 3	Win 4	2007-03-22	1745 m	18.1356	-64.3237	no information	To be completed	2564508	1774234	10781	1767754	4301	48	6	48	6	4	4
SFA18	Galathea 3	Win 6	2007-03-23	2875 m	18.0526	-64.5631	no information	To be completed	2839703	668064	15859	658219	6014	212	11	212	11	7	5
SFA31	Galathea 3	Win 6	2007-03-23	2875 m	18.0526	-64.5631	no information	To be completed	2521949	410668	10551	404160	4043	130	11	130	11	5	5
SFA32	Galathea 3	Win 6	2007-03-23	2875 m	18.0526	-64.5631	no information	To be completed	2177367	870876	7164	867283	3571	64	6	62	5	2	2
SFA33	Galathea 3	Win 6	2007-03-23	2875 m	18.0526	-64.5631	no information	To be completed	1938431	633811	5065	630979	2233	79	12	79	12	4	3
SFA13	KT07-14	MC03	2007-06-20	2800 m	32.11	134	no information	To be completed	1912851	459268	10704	452700	4136	3630	53	3620	48	12	7
SFA14	KT07-14	MC04	2007-06-21	4651 m	31.3	134.075	no information	To be completed	2426509	836403	15527	827199	6323	31088	269	31010	239	10	7
SFA15	KT07-14	MC07	2007-06-23	2091 m	33.3148	136.31	no information	To be completed	2694673	1362091	20597	1350312	8818	124699	602	124355	463	17	11
SFA28	KT07-14	MC07	2007-06-23	2091 m	33.3148	136.31	no information	To be completed	2179077	1016708	15509	1008205	7006	69169	377	69088	341	9	6
SFA29	KT07-14	MC07	2007-06-23	2091 m	33.3148	136.31	no information	To be completed	2763535	1333696	20844	1321777	8925	99141	584	98757	438	10	8
SFA30	KT07-14	MC07	2007-06-23	2091 m	33.3148	136.31	no information	To be completed	2552785	1091190	18232	1080604	7646	102704	543	102408	426	8	5
SFA10	MERIAN 09/02	MUC 685	2008-08-25	3845 m	54.1708	-48.0003	Light brown sandy to silty clay	Kucera et al. (2015)	2305630	1054916	17589	1044699	7372	7015	73	6863	30	8	5
SFA11	MERIAN 09/02	MUC 687	2008-09-03	2634 m	62.3235	-52.3756	Light brown homogeneous clay	Kucera et al. (2015)	2228606	1122605	16744	1112720	6859	1397	17	1390	14	4	2
SFA12	MERIAN 09/02	MUC 697	2008-09-11	2330 m	62.331	-56.2805	Coarse sand with dropstones	Kucera et al. (2015)	2291790	1289968	14051	1281642	5725	1050	18	1040	13	5	4
SFA25	MERIAN 09/02	MUC 687	2008-09-03	2634 m	62.3235	-52.3756	Light brown homogeneous clay	Kucera et al. (2015)	1787177	1087505	10614	1081140	4249	138	2	138	2	1	1
SFA26	MERIAN 09/02	MUC 687	2008-09-03	2634 m	62.3235	-52.3756	Light brown homogeneous clay	Kucera et al. (2015)	2199460	1182483	11881	1175452	4850	1166	14	1160	11	2	2
SFA27	MERIAN 09/02	MUC 687	2008-09-03	2634 m	62.3235	-52.3756	Light brown homogeneous clay	Kucera et al. (2015)	2186467	1401859	12242	1394575	4958	158	2	158	2	1	1
								Global dataset:	76197132	39210426	495978	38917463	203015	488291	1373	486435	697	27	17
